# Supplementary material
Source: Royal Society of Chemistry journal article supplement (doi:10.1039/d6cy00630b)
Supplement: d6cy00630b1.pdf [file d6cy00630b1.pdf]

## Supporting Information

For

### **Engineering Synergistic Di-Iron Sites and Anion Microenvironments in a Metal-Organic Framework Catalyst for Aerobic Wacker-Type Olefin Oxidation**

Jun-Yu Li,<sup>ab</sup> Fu-Qi Mi<sup>c</sup> and Teng Zhang<sup>\*b</sup>

<sup>a</sup> Fujian Science & Technology Innovation Laboratory for Optoelectronic Information of China, Fuzhou 350108, China.

<sup>b</sup> State Key Laboratory of Structural Chemistry, Fujian Institute of Research on the Structure of Matter, Chinese Academy of Sciences, Fuzhou 350002, China.

<sup>c</sup> Shandong Institute of Nonmetallic Materials, Jinan, Shandong 250031, China.

\*Corresponding author: zhangteng@fjirsm.ac.cn

#### Contents

1. General Information
2. Characterization of MOF Materials and MOF-Fe Catalysts
3. XAS Data Collection and Analysis
4. Catalytic Wacker Type Olefin Oxidation
5. Catalytic activity comparison with previously reported catalysts.
6. References

## 1. General Information

All chemicals were obtained from commercial sources (Adamas, Macklin, Energy Chemical, Strem, Sinopharm, etc.) and used without further purification.  $^1\text{H}$  NMR data were collected on a Bruker AVANCE III HD (400 MHz) spectrometer. Chemical shifts were quoted in parts per million (ppm) referenced to the incomplete deuterated solvent peak (7.26 ppm for  $\text{CDCl}_3$ , 2.50 ppm for  $\text{DMSO-d}_6$  or 3.31 ppm for  $\text{CD}_3\text{OD}$ ) or TMS (0 ppm). Powder X-ray diffraction data (PXRD) were recorded on a Bruker-D8 Advance using  $\text{Cu K}\alpha$  radiation source ( $\lambda = 1.5418 \text{ \AA}$ ). Infrared spectra were obtained in the  $400\text{--}4000 \text{ cm}^{-1}$  range using a Bruker VERTEX 70 spectrometer. Inductively coupled plasma optical emission spectrometry (ICP-OES) was performed on HORIBA Jobin Yvon-Ultima2. X-ray photoelectron spectroscopy (XPS) spectra were collected using a Thermo Fisher-ESCALAB 250Xi spectrometer. GC-MS measurements were conducted on a Shimadzu GCMS-QP2020 instrument. Nitrogen adsorption-desorption isotherms were collected on a Micromeritics ASAP 2460 Adsorption Analyzer at 77 K. UV-vis spectra were collected on a lampo 950 UV-vis spectrophotometer. Thermogravimetric analysis (TGA) was performed on a SDT Q600 with a heating rate of  $5 \text{ }^\circ\text{C}/\text{min}$  under nitrogen flow ( $30 \text{ mL}/\text{min}$ ). Scanning electron microscopic (SEM) images were collected by a Hitachi SU-8010 microscope.

## 2. Characterization of MOF Materials and MOF-Fe Catalysts

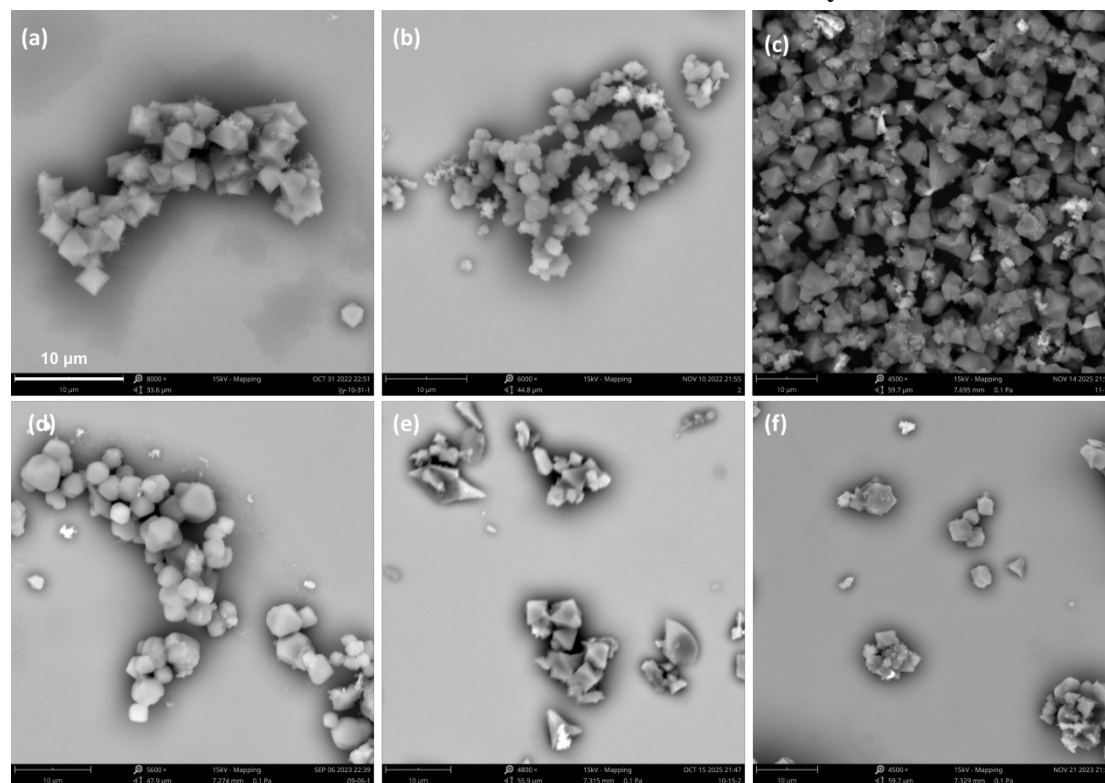

**Figure S1.** SEM images of (a) UiO-67-pyima, (b) UiO-67-pyima-d, (c) UiO-67-pyima- $\text{FeCl}_2$ , (d) UiO-67-pyima-d- $\text{FeCl}_2$ , (e) UiO-67-pyima- $\text{Fe}(\text{OAc})_2$ , (f) UiO-67-pyima- $\text{FeCl}_3$ .

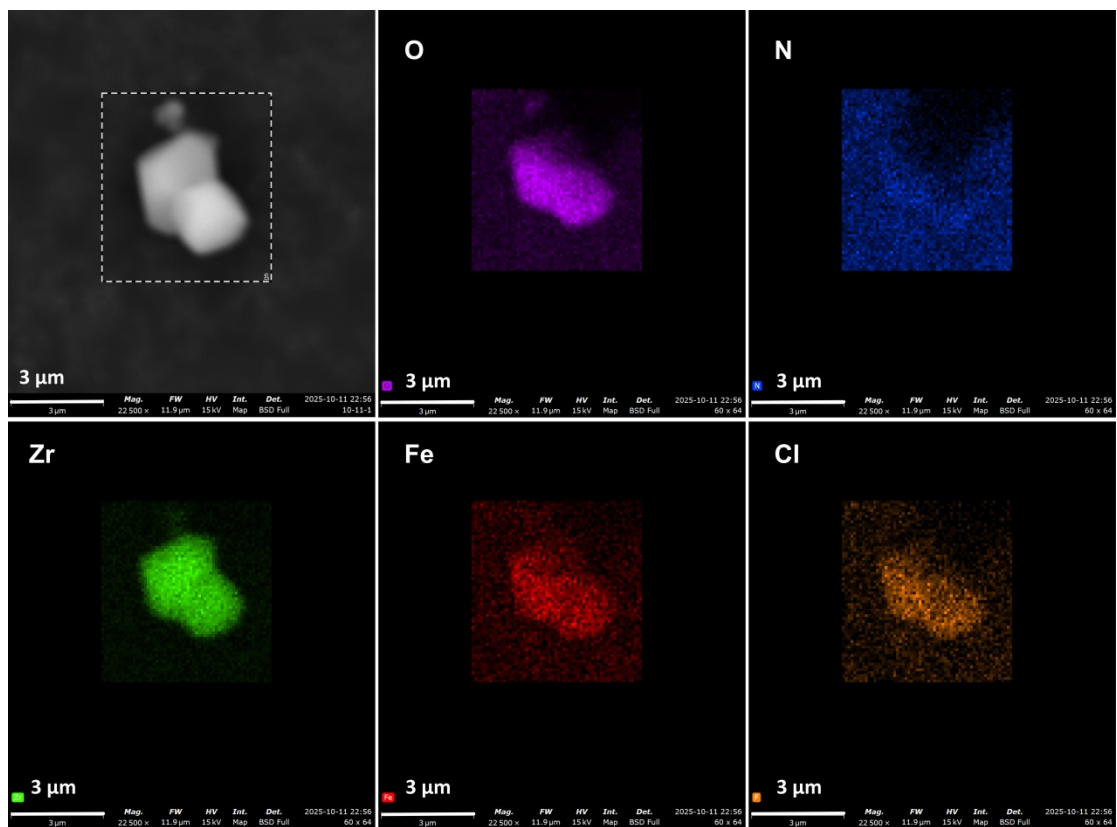

**Figure S2.** Energy-dispersive X-ray spectroscopy (EDS) elemental mapping of UiO-67-pyridine-dichloroiron(II).

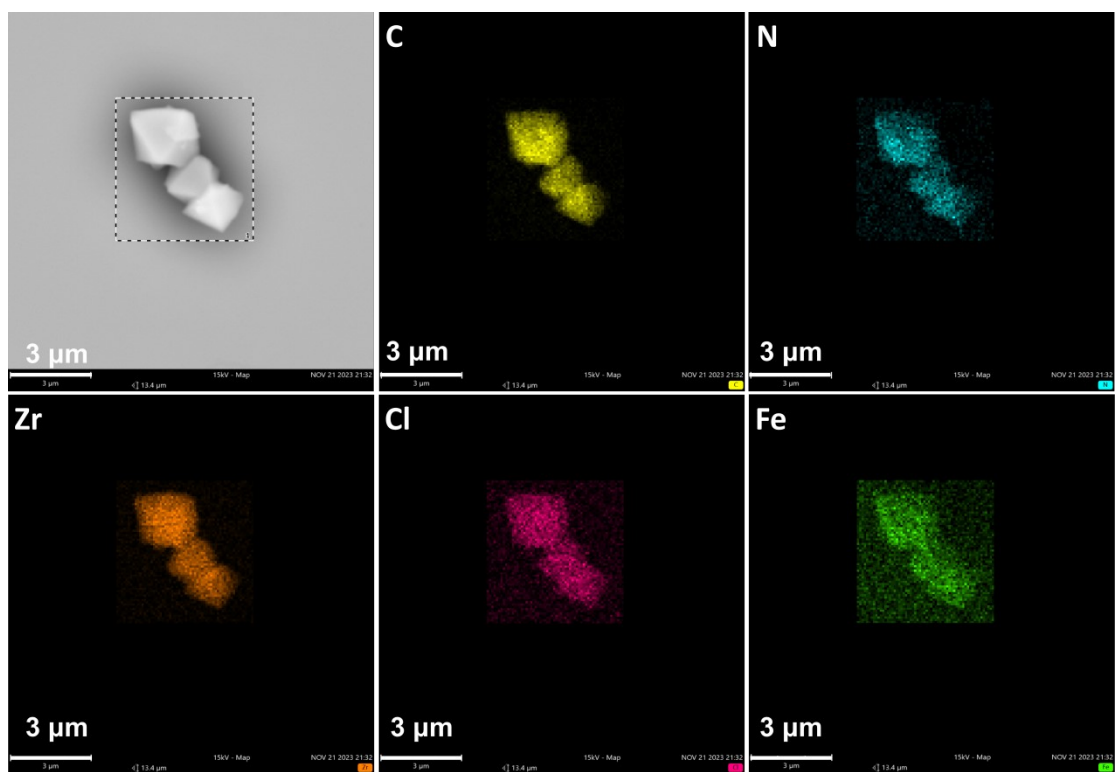

**Figure S3.** Energy-dispersive X-ray spectroscopy (EDS) elemental mapping of UiO-67-pyridine-iron(III).

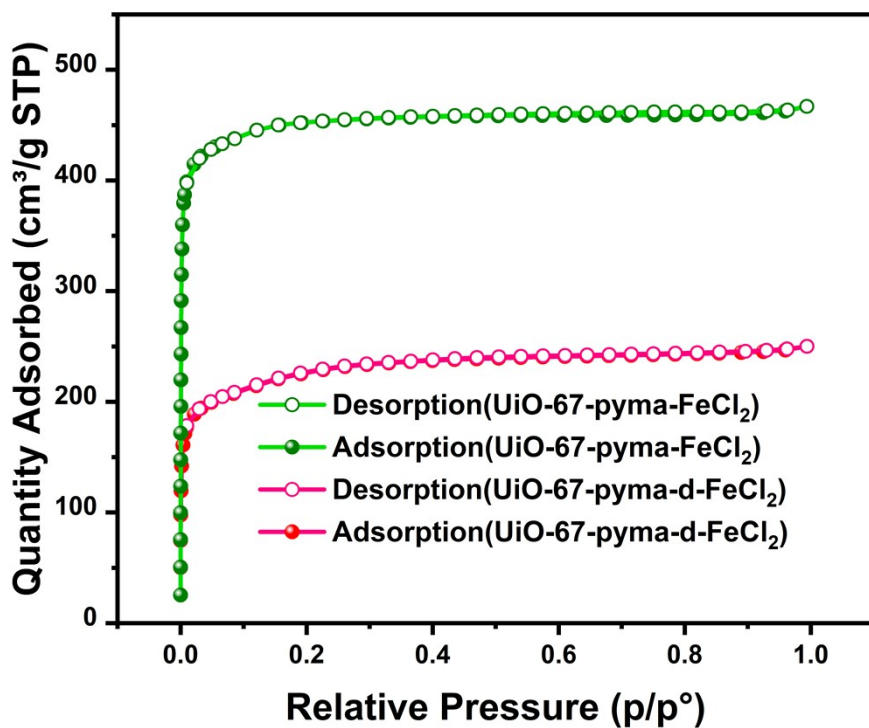

**Figure S4.** Nitrogen adsorption isotherms of UiO-67-pyma-FeCl<sub>2</sub> and UiO-67-pyma-d-FeCl<sub>2</sub>.

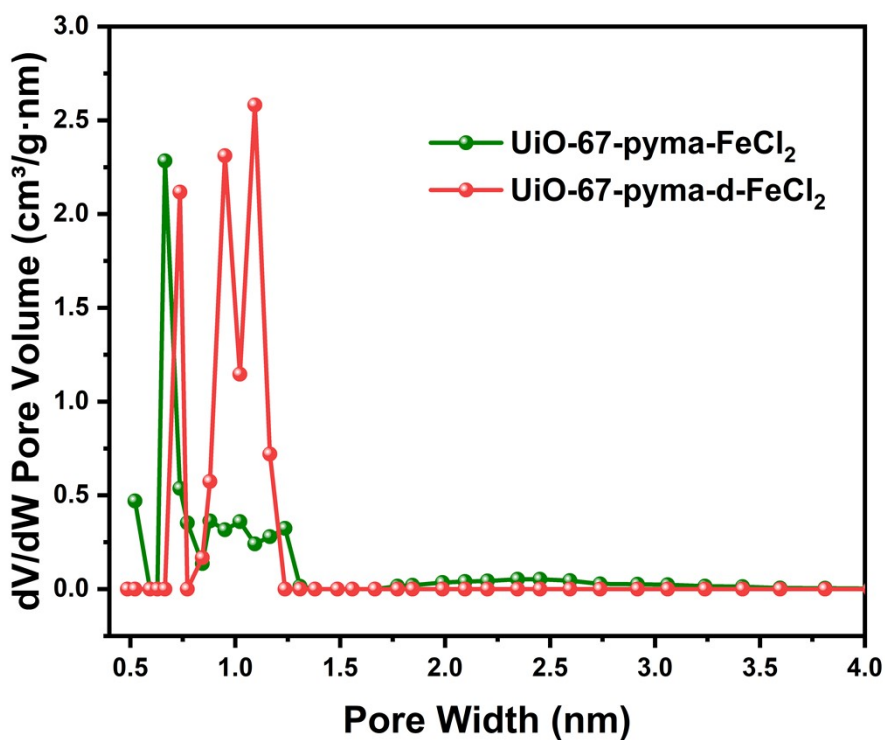

**Figure S5.** NL-DFT pore size distributions of UiO-67-pyma-FeCl<sub>2</sub> and UiO-67-pyma-d-FeCl<sub>2</sub>.

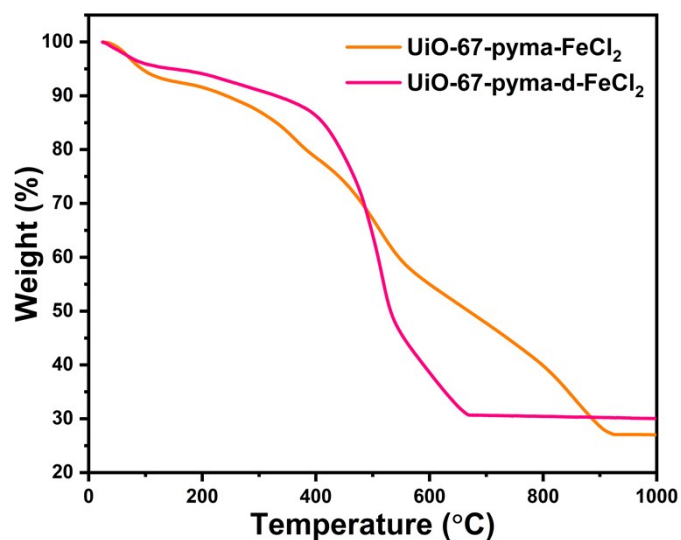

**Figure S6.** TGA trace of UiO-67-pyma-FeCl<sub>2</sub> and UiO-67-pyma-d-FeCl<sub>2</sub>.

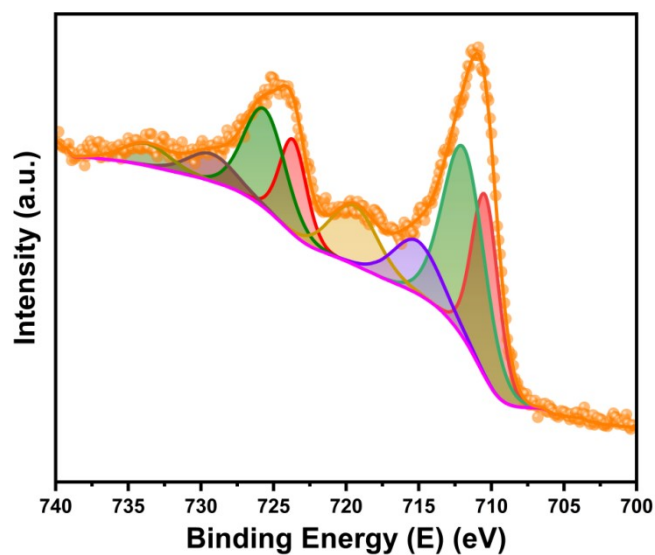

**Figure S7.** XPS spectra of Fe 3p for UiO-67-pyma-FeCl<sub>2</sub> after treatment with O<sub>2</sub> in ethanol.

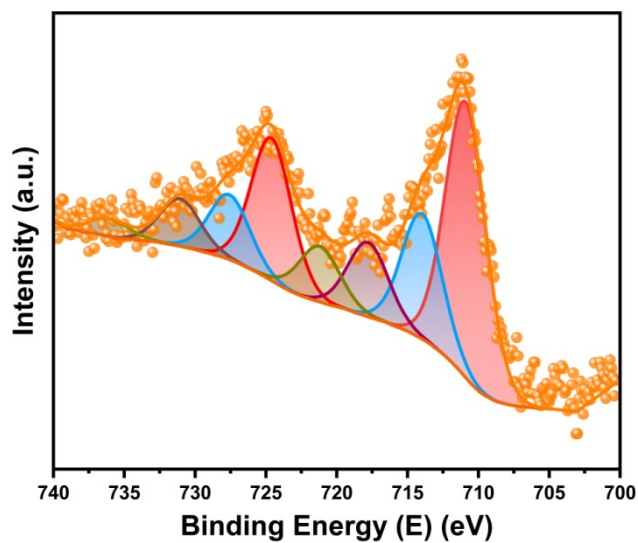

**Figure S8.** XPS spectra of Fe 3p for UiO-67-pyma-d-FeCl<sub>2</sub> after oxygen exposure.

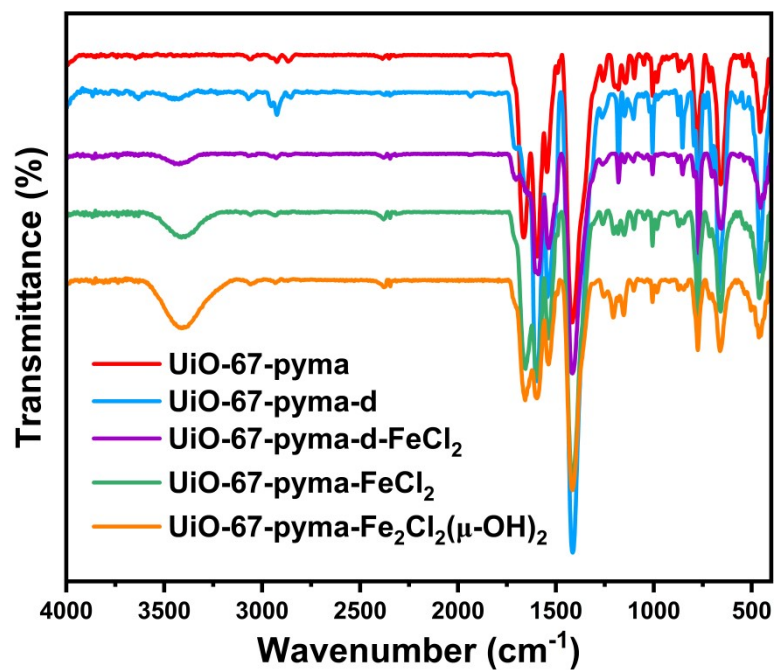

**Figure S9.** Full IR spectra of UiO-67-pyrene, UiO-67-pyrene-d, UiO-67-pyrene-FeCl<sub>2</sub>, UiO-67-pyrene-d-FeCl<sub>2</sub> and UiO-67-pyrene-Fe<sub>2</sub>(μ-OH)<sub>2</sub>.

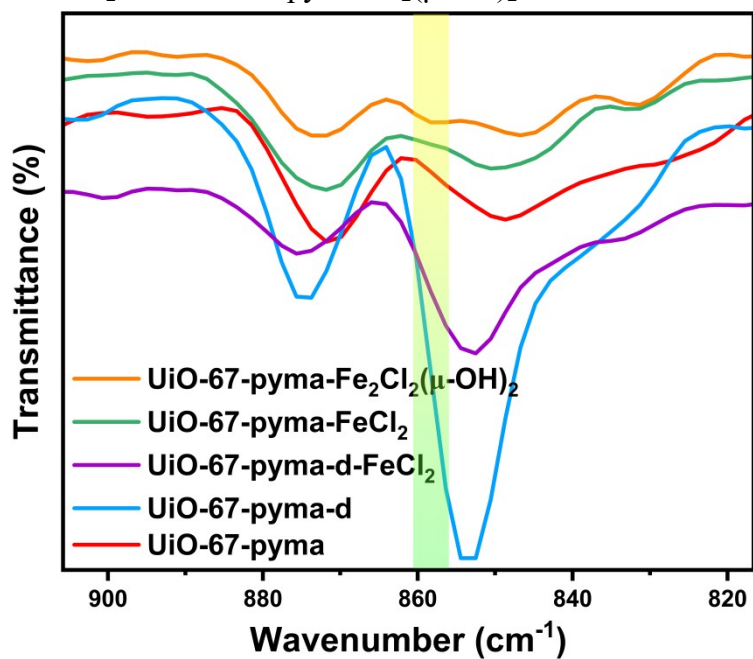

**Figure S10.** Characteristic IR signal of the [Fe<sub>2</sub>(μ-OH)<sub>2</sub>]<sub>2</sub> moiety.

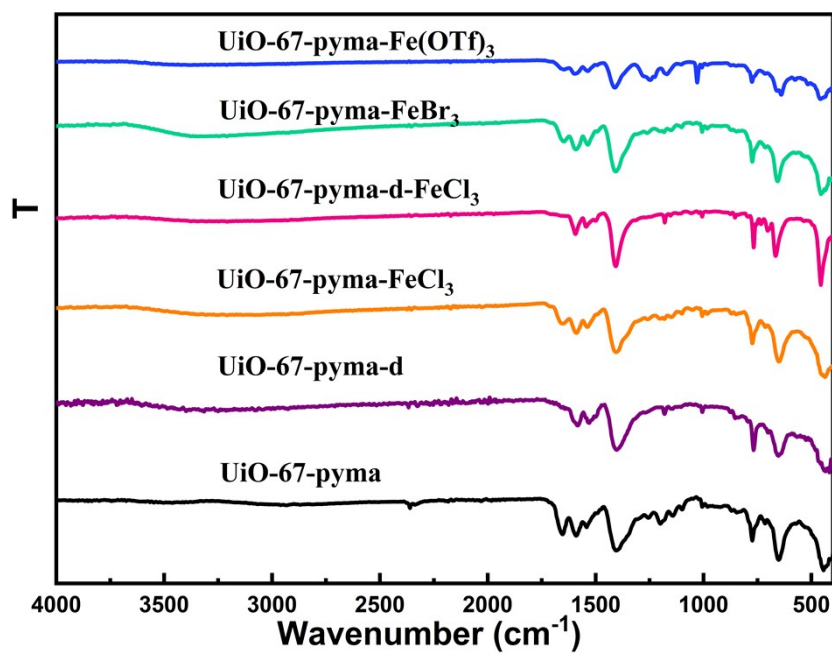

**Figure S11.** Infrared spectra of UiO-67-pyrene, UiO-67-pyrene-d, UiO-67-pyrene-FeCl<sub>3</sub> and UiO-67-pyrene-d-FeCl<sub>3</sub>, UiO-67-pyrene-FeBr<sub>3</sub> and UiO-67-pyrene-Fe(OTf)<sub>3</sub>.

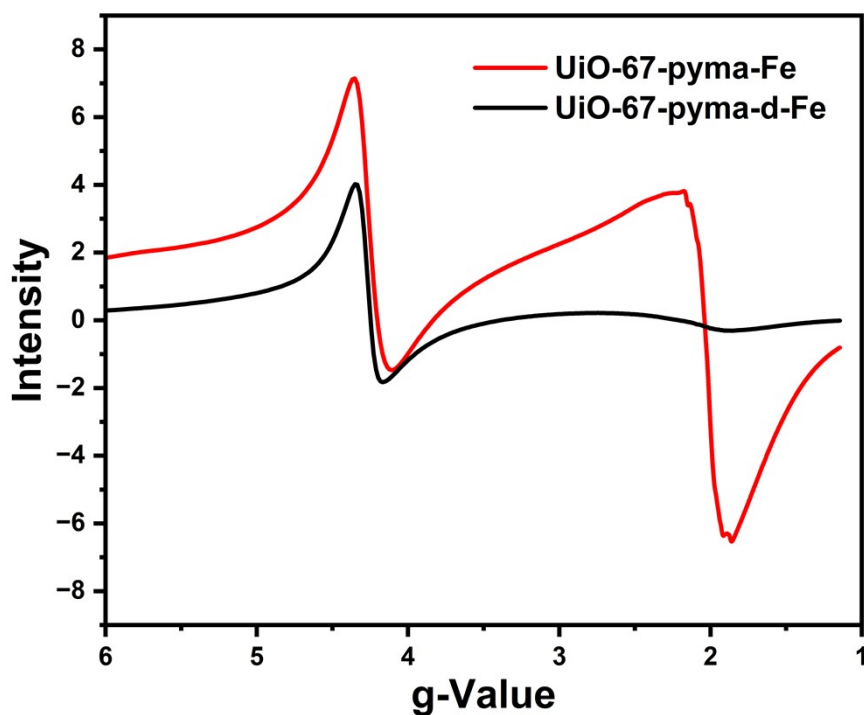

**Figure S12.** EPR spectra of oxidized UiO-67-pyrene-FeCl<sub>2</sub> and UiO-67-pyrene-d-FeCl<sub>2</sub> measured at 100 K.

### 3. XAS Data Collection and Analysis

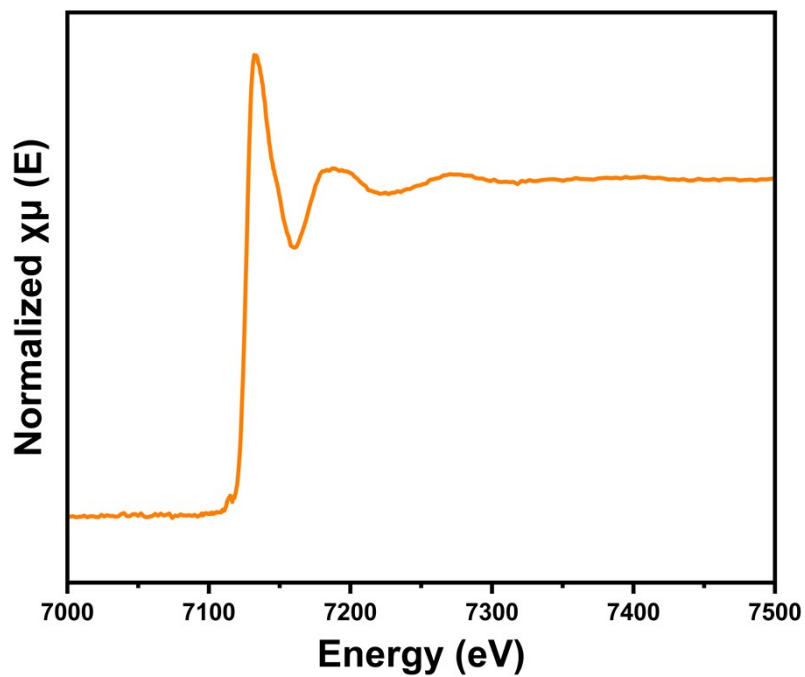

Figure S13. XAS spectrum of oxidized UiO-67-pyridine-FeCl<sub>2</sub>.

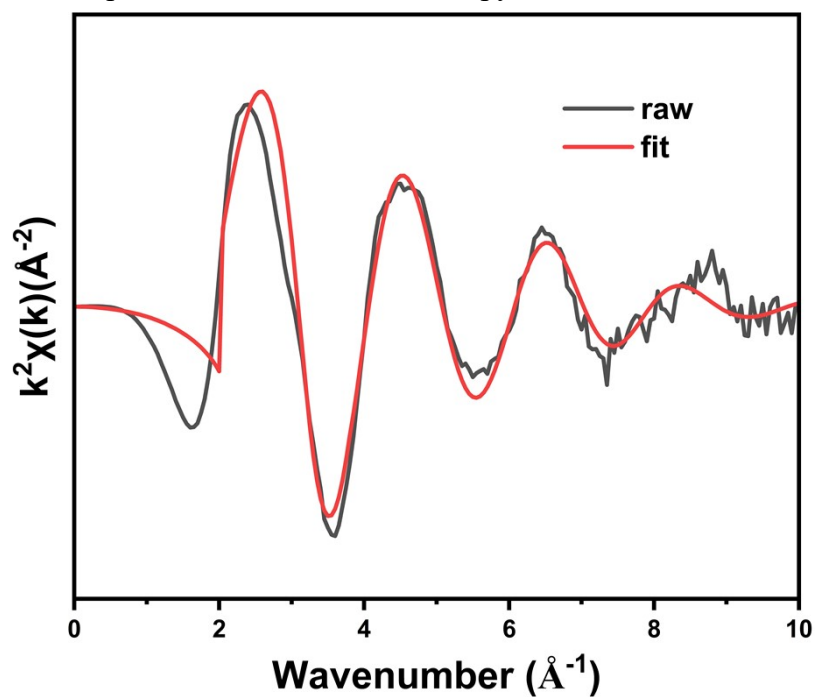

Figure S14. k-space EXAFS spectrum and fit of oxidized UiO-67-pyridine-FeCl<sub>2</sub>.

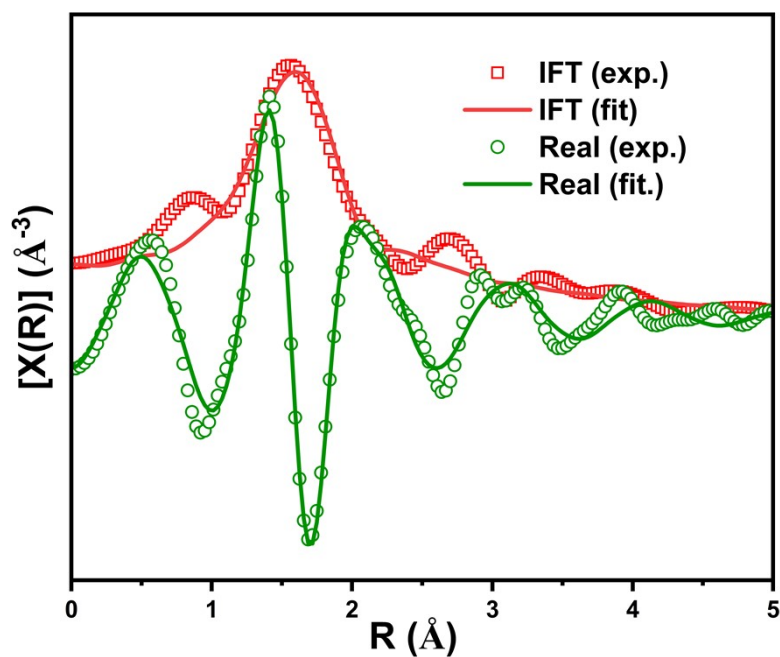

**Figure S15.** EXAFS spectra and fits in R-space at the Fe K-edge of oxidized UiO-67-pyridine-FeCl<sub>2</sub> with the magnitude (open squares, red) and real components (open circles, green) of the Fourier transforms (FT).

**Table S1.** Summary of EXAFS fitting parameters for oxidized UiO-67-pyridine-FeCl<sub>2</sub>.

| $S_0^2$         | $\Delta E_0$ (eV) | Path   | N | R (Å)           | $\sigma^2(10^{-3} \text{ \AA}^2)$ |
|-----------------|-------------------|--------|---|-----------------|-----------------------------------|
| $1.58 \pm 0.72$ | $15.95 \pm 2.41$  | Fe-N/O | 5 | $2.02 \pm 0.03$ | $14.1 \pm 4.8$                    |
|                 |                   | Fe-Cl  | 1 | $2.68 \pm 0.09$ | $19.7 \pm 15.2$                   |

Fitting range:  $k$  3-10  $\text{\AA}^{-1}$ ,  $R$  1.0-3.0  $\text{\AA}$ ; Independent points: 8.6; Number of variables: 6; R-factor: 1.9%; Reduced chi-square: 66.76.

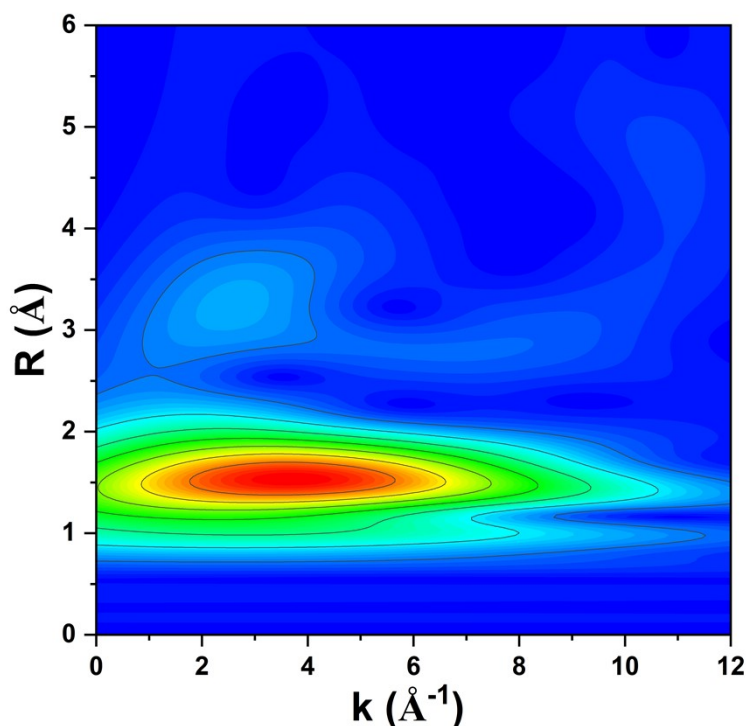

**Figure S16.**  $k^2$ -weighted wavelet transform for the Fe K-edge EXAFS spectrum of UiO-67-pyma-Fe.

#### 4. Catalytic Wacker Type Olefin Oxidation

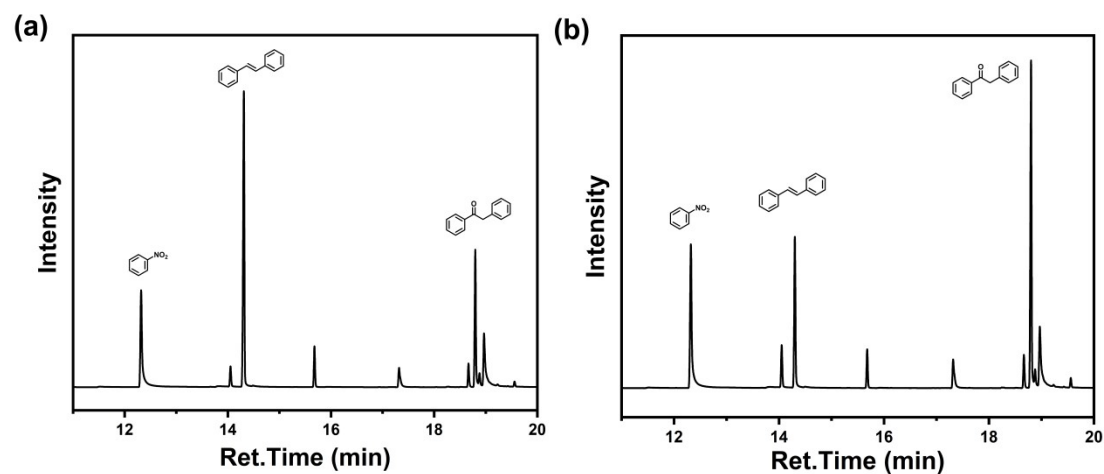

**Figure S17.** GC traces of the Wacker-type oxidation of trans-stilbene: (a) catalyzed by UiO-67-pyma-FeCl<sub>2</sub>; (b) catalyzed by the homogeneous system FeCl<sub>2</sub>/pymae (pymae= N-(2-pyridinylmethyl)ethylamine).

**Table S2.** Screening of hydride sources for the Wacker-type oxidation of olefins catalyzed by UiO-67-pyma-FeCl<sub>3</sub>.

| Entry <sup>[a]</sup> | Additive              | Conversion/% | Yield (2a)/% | Yield (2b)/% |
|----------------------|-----------------------|--------------|--------------|--------------|
| 1                    | PhSiH <sub>3</sub>    | 99.7         | 74           | 20           |
| 2                    | PMHS                  | 8.0          | 6            | 2            |
| 3                    | DHP                   | 0.9          | 0.07         | 0.5          |
| 5                    | Et <sub>3</sub> SiH   | 5.1          | 0.2          | 1.5          |
| 6                    | Me <sub>2</sub> PhSiH | 4.3          | 0.5          | 1.6          |

|                  |                        |      |     |     |
|------------------|------------------------|------|-----|-----|
| 7                | TMDS                   | 11.1 | 6.1 | 2.1 |
| 8                | (EtO) <sub>3</sub> SiH | 29.5 | 12  | 5   |
| 9 <sup>[b]</sup> | (EtO) <sub>3</sub> SiH | 99.5 | 61  | 20  |

[a] Reaction conditions: p-methoxystyrene (40  $\mu$ L, 0.3 mmol), phenylsilane (74  $\mu$ L, 0.6 mmol), UiO-67-pyridine-FeCl<sub>3</sub> (7.6 mg, 3 mol% for Fe), 2 mL EtOH, Stirred in the air. The conversions and yields were determined by GC. [b] The reaction time was extended to 72 h.

**Table S3.** Screening of temperature for Wacker oxidation reaction of olefins catalyzed by UiO-67-pyridine-FeCl<sub>3</sub>.

| Entry | Temperature/<br>°C | Time/h | Conversion/% | Yield(2a)/% | Yield(2b)/% |
|-------|--------------------|--------|--------------|-------------|-------------|
| 1     | 10                 | 120    | 100          | 77          | 13          |
| 2     | 25                 | 12     | 99.7         | 74          | 20          |
| 3     | 50                 | 12     | 99.8         | 51          | 43          |

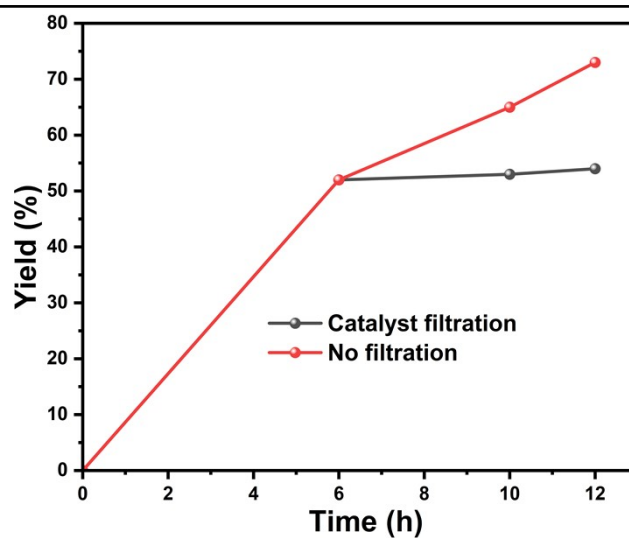

**Figure S18.** Hot filtration test for the Wacker-type oxidation of p-methoxystyrene catalyzed by UiO-67-pyridine-FeCl<sub>2</sub> with 1 mol% Fe loading.

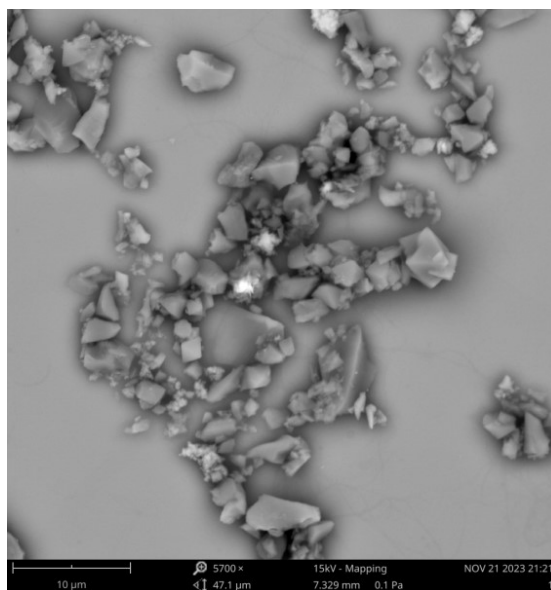

**Figure S19.** SEM image of the recovered catalyst after the catalytic reaction.

#### 4.3 Gas chromatography testing

**Table S5.** Retention times of substrates and products in the catalytic reaction.

| Substrate                                                                           | Retention time | Product                                                                                                                                                                      | Retention time       |
|-------------------------------------------------------------------------------------|----------------|------------------------------------------------------------------------------------------------------------------------------------------------------------------------------|----------------------|
| 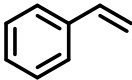 | 8.8 min        | <br>   | 12.1 min<br>11.9 min |
|  | 13.7 min       | <br> | 16.0 min<br>15.7 min |
|  | 11.1 min       | <br>   | 14.1 min<br>13.5 min |

|                                                                                     |          |                                                                                                                                                                              |                      |
|-------------------------------------------------------------------------------------|----------|------------------------------------------------------------------------------------------------------------------------------------------------------------------------------|----------------------|
| 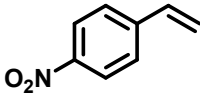   | 15.4 min | <br>     | 16.7 min<br>17.5 min |
|    | 12.2 min | <br>     | 14.6 min<br>14.8 min |
|    | 9.4 min  |                                                                                           | 11.5 min             |
|  | 13.7 min | <br> | 16.2 min<br>15.9 min |
|  | 11.7 min |                                                                                          | 15.1 min             |
|  | 15.2 min |                                                                                          | 16.3 min             |

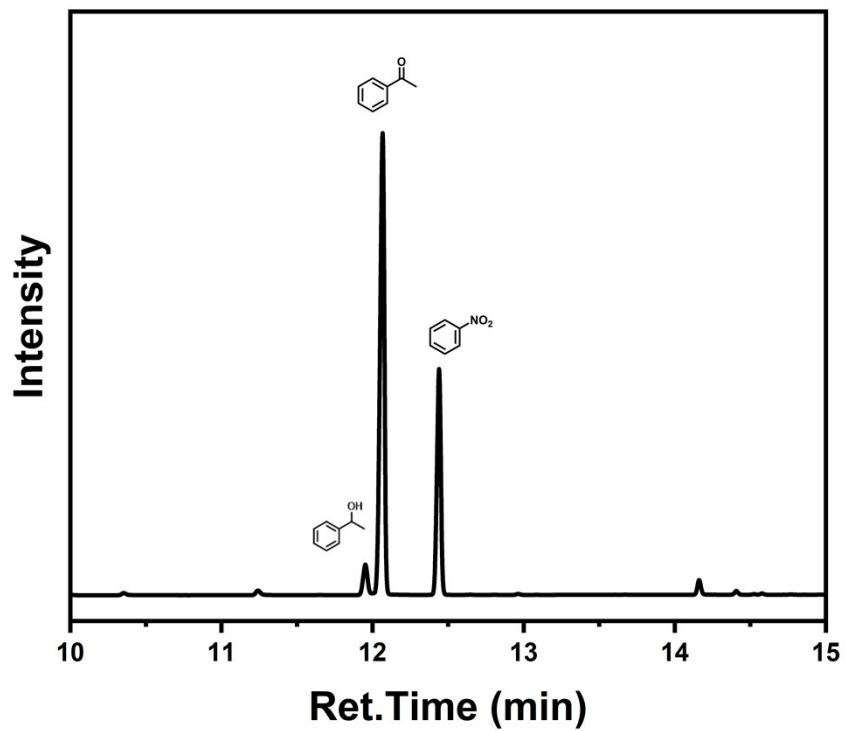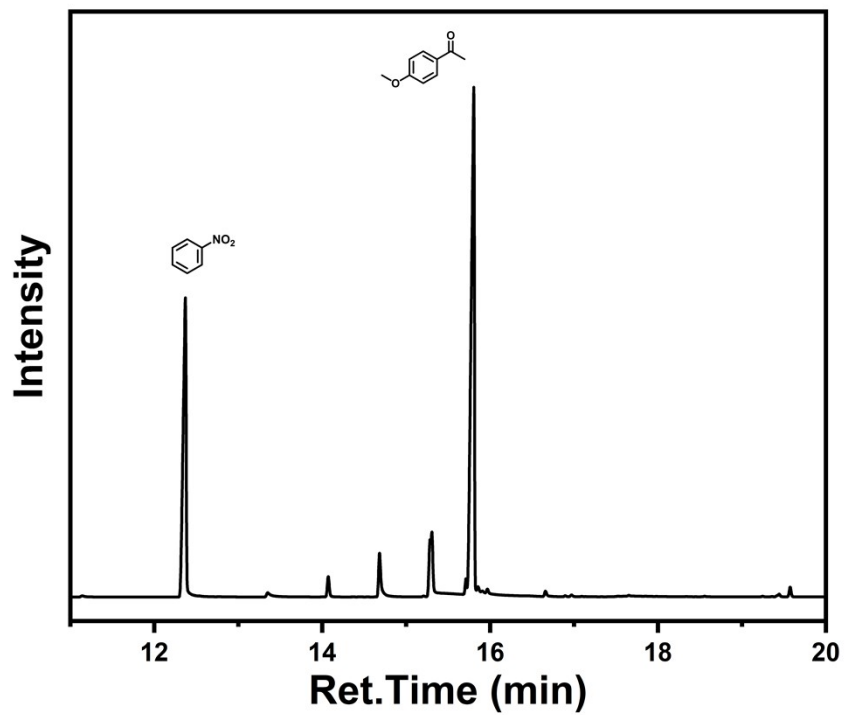

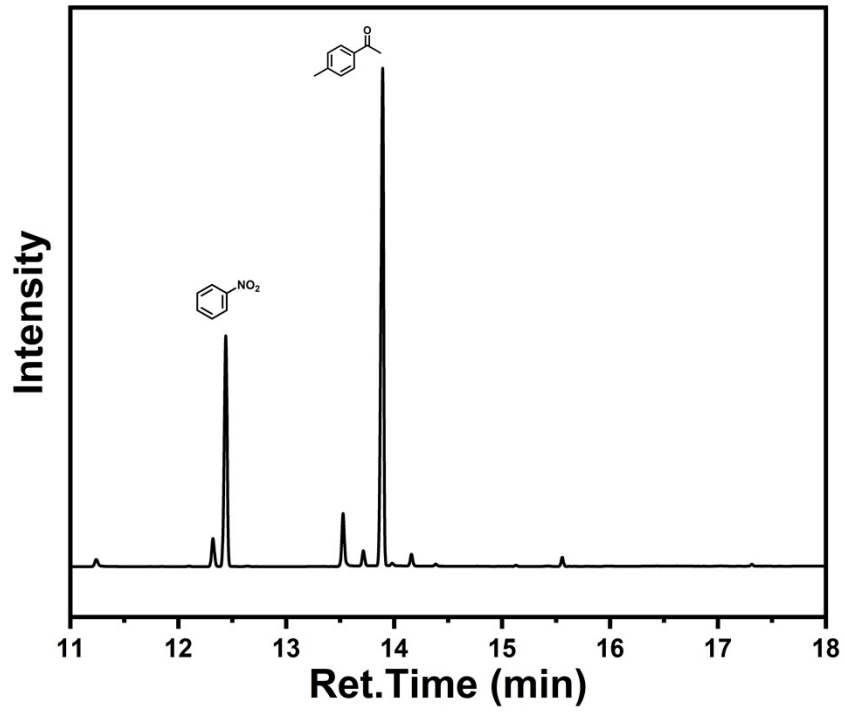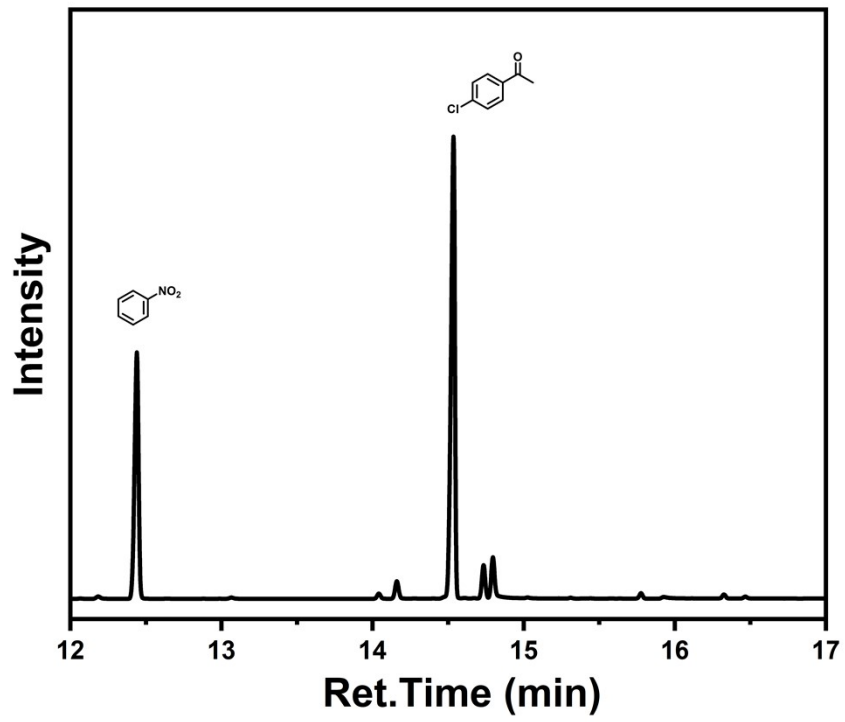

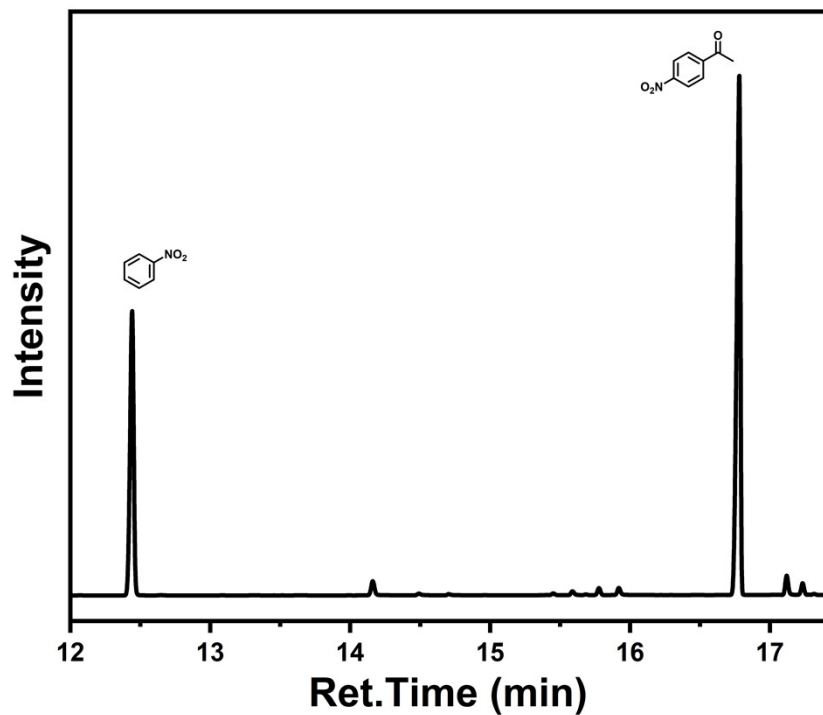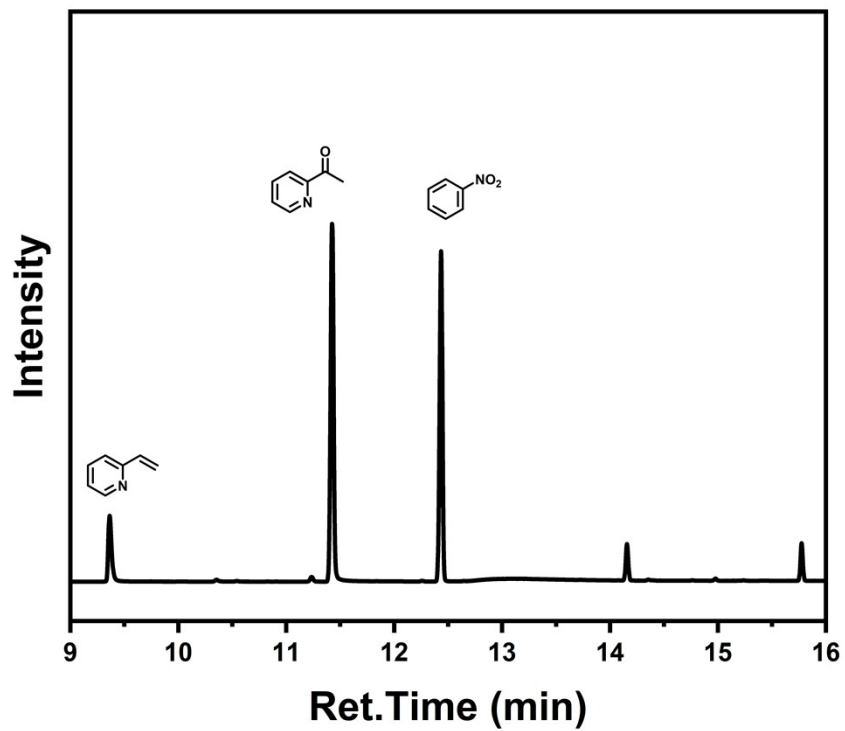

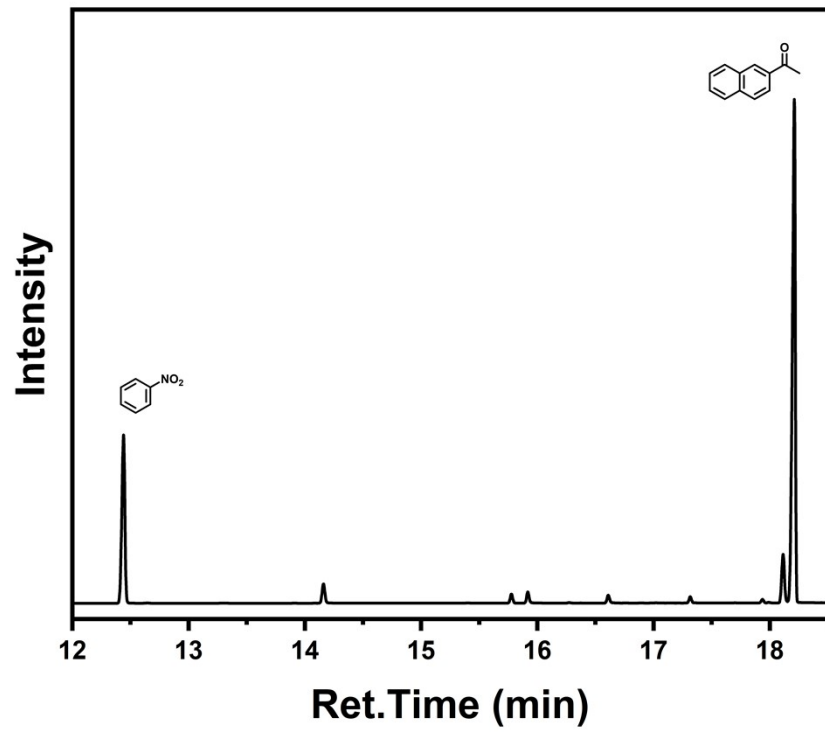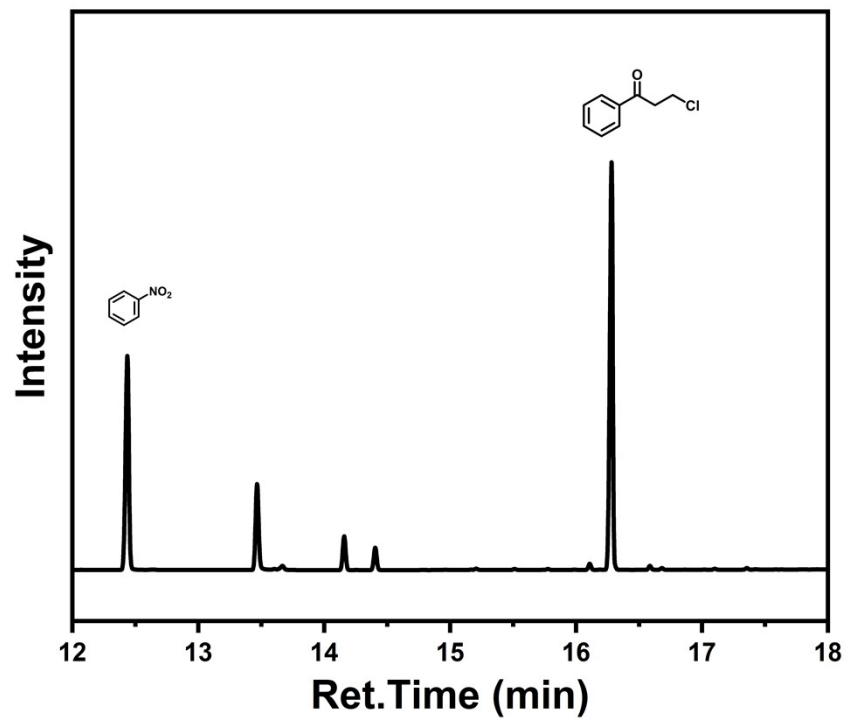

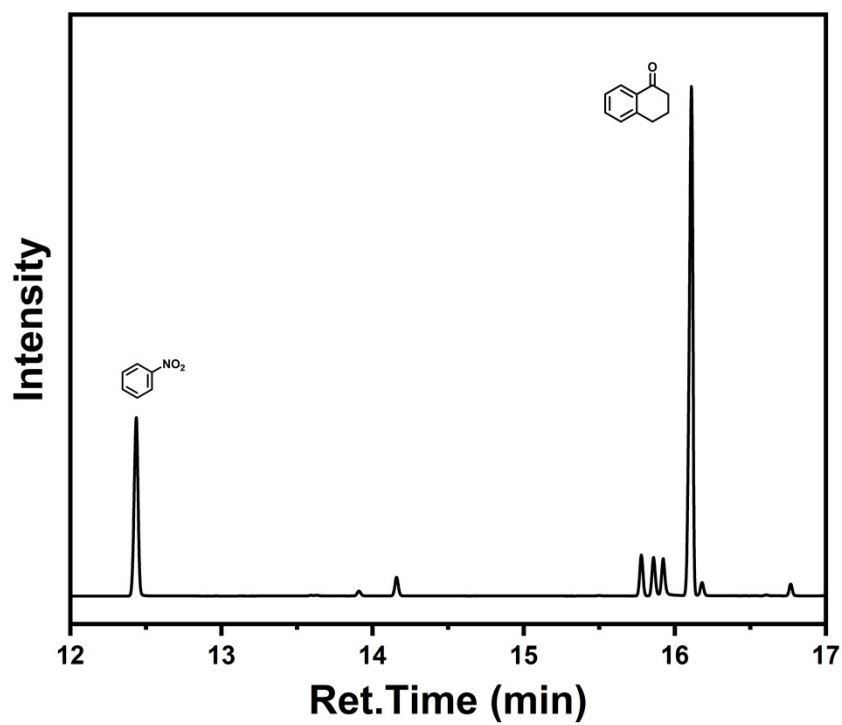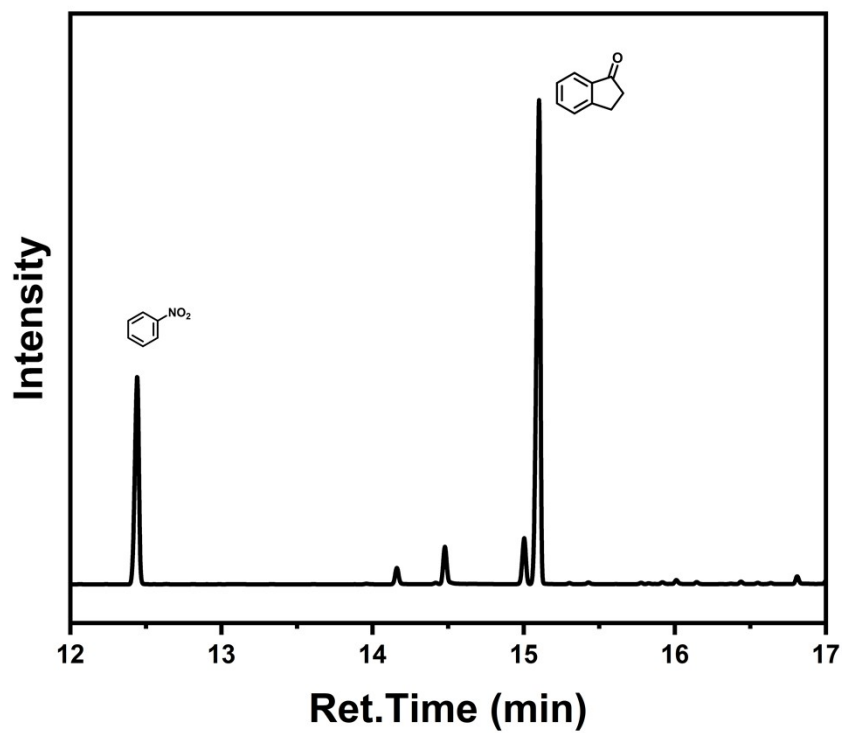

**5. Catalytic activity comparison with previously reported catalysts.**

**Table S6.** Comparison of Catalytic Activity in the Wacker-Type Oxidation of Styrene

over Various Fe- and Co-Based Catalysts.

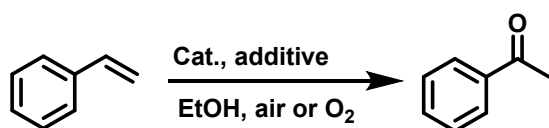

| Entry | Catalyst                                     | Reaction conditions                                                                  | Yield/% | Ref.      |
|-------|----------------------------------------------|--------------------------------------------------------------------------------------|---------|-----------|
| 1     | FeCl <sub>2</sub> (10 mol%)                  | PMHS (3 equiv), EtOH, 80°C, and air.                                                 | 84      | 1         |
| 2     | FePcF <sub>16</sub> (5 mol%)                 | Et <sub>3</sub> SiH (2 equiv), EtOH, r.t., O <sub>2</sub> (1 atm).                   | 68      | 2         |
| 3     | iron(III)-porphyrin complex Fe-1 (2.5 mol %) | PhSiH <sub>3</sub> (3 equiv), EtOH, r.t., air.                                       | 96      | 3         |
| 4     | Fe/porphyrin (2.5 mol %)                     | PhSiH <sub>3</sub> (2 equiv), α-cyclodextrin (0.5 equiv), 15 μL of DMSO, 25 °C, air. | 94      | 4         |
| 5     | CoTPP (1 mol %)                              | PMHS (1 equiv), EtOH, 70°C, O <sub>2</sub> (1 bar)                                   | 81      | 5         |
| 6     | SBA-15-A-S-Co (20 mg/mmol olefin)            | PhSiH <sub>3</sub> (2 equiv), EtOH, 50°C, O <sub>2</sub> (1 atm).                    | 80      | 6         |
| 7     | UiO-67-pyima-FeCl <sub>2</sub> (3 mol %)     | PhSiH <sub>3</sub> (1.2 equiv), EtOH, r.t., air.                                     | 94      | This work |

## 6. References

- Liu, B.; Jin, F.; Wang, T.; Yuan, X.; Han, W., Wacker-Type Oxidation Using an Iron Catalyst and Ambient Air: Application to Late-Stage Oxidation of Complex Molecules. *Angew Chem Int Ed Engl* **2017**, *56* (41), 12712-12717.
- Puls, F.; Knölker, H. J., Conversion of Olefins into Ketones by an Iron-Catalyzed Wacker-type Oxidation Using Oxygen as the Sole Oxidant. *ANGEWANDTE CHEMIE-INTERNATIONAL EDITION* **2018**, *57* (5), 1222-1226.
- Trouvé, J.; Youssef, K.; Kasemthaveechok, S.; Gramage-Doria, R., Catalyst Complexity in a Highly Active and Selective Wacker-Type Markovnikov Oxidation of Olefins with a Bioinspired Iron Complex. *ACS Catalysis* **2023**, *13* (7), 4421-4432.
- Jiang, C.; Wu, Y.; Zhang, Y.; Zong, J.; Wang, N.; Liu, G.; Liu, R.; Yu, H., Supramolecular Modulation for Selective Mechanochemical Iron-Catalyzed Olefin Oxidation. *Angewandte Chemie International Edition* **2025**, *64* (1), e202413901.
- Abuhafez, N.; Gramage-Doria, R., Cobalt-Catalyzed Wacker-Type Aerobic Oxidation of Olefins into Ketones Enabled by PMHS: Giving Value to a Chemical Waste with Optimal Atom-Economy. *ChemCatChem* **2024**, *16* (16), e202400333.
- Chang, C.; Hou, Y.; Li, J., Heterogeneous cobalt-complex catalyst for wacker-type oxidation of styrene by balloon O<sub>2</sub>. *Molecular Catalysis* **2025**, *577*, 114959.
